# Supplementary material for: Alkbh1 and Tzfp repress a non-repeat piRNA cluster in pachytene spermatocytes
Source: PubMed Central journal article supplement — Nucleic Acids Res. 2012 Sep 8;40(21):10950–63. doi: 10.1093/nar/gks839 (PMC3505970; doi:10.1093/nar/gks839), 2012-09-08
Supplement: supp_gks839_nar-01652-a-2012-File009.pdf [file supp_gks839_nar-01652-a-2012-File009.pdf]

## Supplementary Methods and Figure Legends

### Alkbh1 and Tzfp Repress a Non-Repeat piRNA Cluster in Pachytene Spermatocytes

Line M. Nordstrand<sup>1#</sup>, Kari Furu<sup>1#</sup>, Jonas Paulsen<sup>2</sup>, Torbjørn Rognes<sup>1,3</sup> and Arne Klungland<sup>1,4\*</sup>

<sup>1</sup> Centre for Molecular Biology and Neuroscience, Department of Microbiology, Oslo University Hospital, Rikshospitalet, PO Box 4950 Nydalen, NO-0424 Oslo, Norway

<sup>2</sup> Institute for Medical Informatics, Oslo University Hospital, The Norwegian Radium Hospital, PO Box 4953 Nydalen, NO-0424 Oslo, Norway

<sup>3</sup> Department of Informatics, University of Oslo, PO Box 1080 Blindern, NO-0316 Oslo, Norway

<sup>4</sup> Institute of Basic Medical Sciences, University of Oslo, PO Box 1018 Blindern, NO-0315 Oslo, Norway

#### SUPPLEMENTARY METHODS

##### Yeast Two-Hybrid Screening (Y2H)

A LexA-based yeast two-hybrid (Y2H) screen of testis-specific transcripts with full-length human ALKBH1 as bait was conducted. Clones that grew under selection were pulled out from the primary screening plates, restreaked onto new selection plates and assayed for activity of the second reporter gene, lacZ, using a quantitative  $\beta$ -galactosidase assay (HTX assay, see <http://www.dualsystems.com/> for details). Clones that survived the primary selection and lacZ tests were picked and the library plasmid isolated and amplified in *E. coli*. Since yeast cells have the potential to take up several independent library plasmids during the transformation procedure, two independent *E. coli* transformants per original yeast clone were picked for plasmid isolation.

##### Dot Blot Analysis

0.2  $\mu$ g, 0.7  $\mu$ g and 1.4  $\mu$ g of purified ALKBH1 (a kind gift from Professor H. Krokan, NTNU in Trondheim) was dotted onto a nitrocellulose membrane and then blocked with skimmed milk. The membrane was incubated with full-length or truncated TZFP-Myc (approximately 10  $\mu$ g in 5 ml PBST) and the ALKBH1-TZFP complex was detected using anti-Myc (Clontech). Full length TZFP-Myc was used as a positive control (12.5 ng, 50 ng and 100 ng) to check the efficiency of the antibody. BSA was used as a negative control (10 ng, 50 ng and 100 ng) to check for unspecific binding of TZFP to other proteins. In addition, one blot was not incubated

with TZFP and thus works as a negative control for unspecific binding of the antibody. TZFP-Myc was purified from transfected HEK-cells by immunoprecipitation using anti-Myc coated agarose beads (Pierce Biotechnology).

### **Immunofluorescent Staining of Pachytene Cells**

The purity of pachytene spermatocytes isolated using the STAPUT method was also verified using pachytene specific antibodies. Isolated cells were fixed onto SuperFrost Plus slides (VWR) using Cell Adhesive Solution (Crystalgen, Lot no 425081). Before staining, the cells were washed in 1x PBS and blocked in 1% BSA for 1 hour at room temperature. The slides were then incubated with primary antibodies overnight at 4°C prior to detection with secondary antibodies. Primary antibodies used were mouse anti-H2A.X (1:500, Millipore) and rabbit anti-SCP3 (1:1000, Abcam). Secondary antibodies used were goat anti-mouse Alexa 488 (green dye) (1:200, Sigma-Aldrich) and goat anti-rabbit Alexa 594 (red dye) (1:500, Sigma-Aldrich), respectively. The slides were counterstained with DAPI (Invitrogen) and mounted with Mowiol (Merck Biosciences Ltd). Pictures were taken using an AxioCam MR Rev3 camera on an Axio Observer.Z1 microscope with Apotome (Carl Zeiss). The images were processed using AxioVision 4.8 software (Carl Zeiss) and Image J.

### **mRNA Sequencing and Computational Analysis**

Large RNAs >200 nt were isolated from C57BL6/J and *Alkbh1*<sup>-/-</sup> pachytene cells using the mirVana miRNA Isolation Kit (Ambion) in line with the manufacturer's protocol. Any DNA remnants were removed from the RNA using TURBO DNase (Ambion) before mRNA isolation was performed. One µg RNA from wild-type and 1.6 µg RNA from *Alkbh1*<sup>-/-</sup> were diluted to 50 µL, and mRNA was isolated using the Sera-Mag® Magnetic Oligo(dT) Particles (Thermo Scientific part#1004815) according to the manufacturer's protocol. From here, the mRNA-Seq Sample Preparation Guide (Illumina part # 1004898, Rev D September 2009) was used to perform ligation of 5' and 3' adapters to the cDNA and purification of the ligation product. cDNA template was enriched by PCR amplification (15 cycles) using the mRNA Seq 8 Sample Prep Kit (RS-100-0801, Illumina). Finally, the mRNA library (230-233 bp) was sequenced (75 bp Paired-End Read) using the Illumina Genome Analyzer IIx (GAIIx).

Mapping of sequence reads to the genome was done using TopHat (48). The output from TopHat was then converted to BED-format using a script from Ensembl (<ftp://193.62.203.113/pub/ensembl-functgenomics/scripts/miscellaneous/sam2bed.pl>). These reads were then intersected with all known mouse genes from Ensembl using intersectBed. Similar to the analysis of the piRNAs, reads were counted for each annotated gene. Reads that were annotated to multiple genes were discarded. The DESeq package was used for statistical analysis of differential expression, similar to the method used for the piRNA clusters.

**REFERENCES:**

50. Trapnell,C., Pachter,L. and Salzberg,S.L. (2009) TopHat: discovering splice junctions with RNA-Seq. *Bioinformatics.*, 25, 1105-1111

## SUPPLEMENTARY FIGURE AND TABLE LEGENDS

Figure S1. Tzfp is the interaction partner of Alkbh1 in testis. (A) Human TZFP sequences identified by a yeast 2-hybrid (Y2H) screen with testis-specific transcripts against full-length human ALKBH1 as bait. The screen yielded four positive clones, and sequencing analysis revealed that three of these clones represented the same gene (left panel). All three clones were assayed for activity by a second reporter gene, lacZ, using a quantitative  $\beta$ -galactosidase assay (right panel). (B) Plasmid control digest was performed on the three clones in two independent *E. coli* transformants. (C) Verification of interaction between human ALKBH1 and TZFP by Dot blot analysis. ALKBH1 protein was dotted onto a nitrocellulose membrane before the membrane was incubated with full-length or truncated TZFP-Myc. Positive control, full length TZFP-Myc; negative control, BSA.

Figure S2. Purity analysis of STAPUT isolated pachytene spermatocytes. (A) Image analysis of STAPUT purified pachytene cells reveals a homogenous population of cells. One isolation from six males yielded approximately  $1.5 \times 10^6$  pachytene cells with an average size of 12.5  $\mu\text{m}$ . Analysed on the Countess® Automated Cell Counter (Invitrogen). (B) Specific expression of *Lcn2* in pachytene spermatocytes confirms high purity of STAPUT isolated cell fractions. Analysed by SYBR Green qPCR of pachytene spermatocytes (PS) and round spermatids (RSd). (C) The meiotic pachytene cells are easily detected by double immunostaining. H2A.X marks the transcriptionally silenced XY chromatin domain (red), SYCP3 stains the chromosome axial elements of the synaptonemal complex (green), and DAPI labels DNA (blue). (Magnification:  $\times 20$ ).

Figure S3. Significantly up- and downregulated piRNA clusters in pachytene cells lacking Alkbh1 and Tzfp. Identical to scatterplot analysis in Fig. 4 except that all piRNA clusters significantly differentially expressed in wild-type versus mutants are presented with coloured, filled-circles. Expression of piRNA clusters in pachytene cells are plotted on a log2 scale in a pairwise comparison of wild-type (y-axis) and *Alkbh1*<sup>-/-</sup> (x-axis) (A) and of wild-type (y-axis) and *Tzfp*<sup>GTI/GTI</sup> (x-axis) (B). Cluster 1082B is the piRNA cluster deviating most dramatically from the center line in both mutant samples (black, filled-circle). In contrast, clusters with similar number of reads from the two samples being compared line up together on the center line (grey, open-circles).

Figure S4. Significantly upregulated mRNAs in pachytene cells from wild-type and *Alkbh1*<sup>-/-</sup> testes. (A) Scatterplot analysis of mRNA reads annotated by high-throughput sequencing. Expression of mRNAs in pachytene cells are plotted on a log2 scale in wild-type (y-axis) compared to *Alkbh1*<sup>-/-</sup> (x-axis). mRNAs with notably higher number of reads in the *Alkbh1*<sup>-/-</sup> sample than in the wild-type sample deviate from the center line (coloured, filled-circles). In contrast, mRNAs with similar number of reads from the two samples being compared line up

together on the center line (grey, open-circles). (B) mRNAs upregulated more than 4-fold in *Alkbh1*<sup>-/-</sup> versus wild-type pachytene cells are listed.

Table S1. Sequence of primers and oligonucleotides used in this study. Primers for genotyping of the *Alkbh1* gene (1-3) and the *Tzfp* gene (4-6), Taqman probes (7-10), miScript primers for the quantification of individual piRNAs (11-15), DIG-labeled oligonucleotide specific for piRNA used in FISH (16), and SYBR Green qPCR primers for expression analyses of transposons (17-24), the pachytene marker *Lcn2* (25-26), and the endogenous control *Gapdh* (27-28) are listed.

Table S2. Classification of small RNA sequences after Illumina sequencing of wild-type, *Alkbh1*<sup>-/-</sup> and *Tzfp*<sup>GTI/GTI</sup> pachytene cells. Number of sequence reads mapping to each category in wild-type, *Alkbh1*<sup>-/-</sup> and *Tzfp*<sup>GTI/GTI</sup> pachytene cells from 12-week old males. We did two separate runs with a 1-year interval between the mutants and corresponding wild-type samples. Small RNA reads were annotated as described in the Methods section.

Table S3. Significantly up- and downregulated piRNA clusters in *Alkbh1*<sup>-/-</sup> and *Tzfp*<sup>GTI/GTI</sup> samples versus wild-type. Number of piRNA cluster reads in wild-type, *Alkbh1*<sup>-/-</sup> and *Tzfp*<sup>GTI/GTI</sup> pachytene cells. Cluster name is the ID assigned by piRNABank (<http://pirnabank.ibab.in>) or by piRNADB (<http://kbrb.ioz.ac.cn/piRNA>). The logfold change is calculated using  $\log_2(\text{exprKO}+1) - \log_2(\text{exprWT}+1)$ , and the numbers are normalized against the total number of mapped reads for each sample. Cluster 1082B, the only piRNA cluster highly upregulated in both mutants, is presented with grey shading.

Table S4. Significantly differentially expressed genes found in *Alkbh1*-null versus wild-type pachytene cells. Number of mRNA sequence reads in wild-type and *Alkbh1*<sup>-/-</sup> pachytene cells from 12-week old males. Gene ID is the Ensembl accession number. The logfold change is calculated using  $\log_2(\text{exprKO}+1) - \log_2(\text{exprWT}+1)$ , and the numbers are normalized against the total number of mapped reads for each sample.

Table S5. Potential target regions in the mouse genome of piRNAs from cluster 1082B identified by sequence similarity. The chromosomal location, direction and length of potential target regions for piRNAs derived from cluster 1082B.

**A**

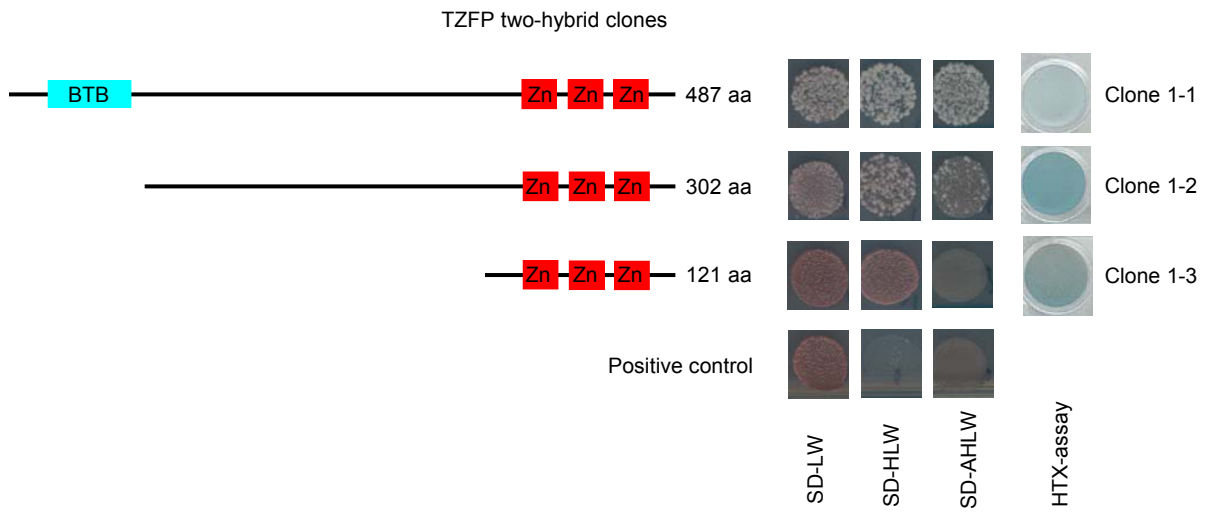

**B**

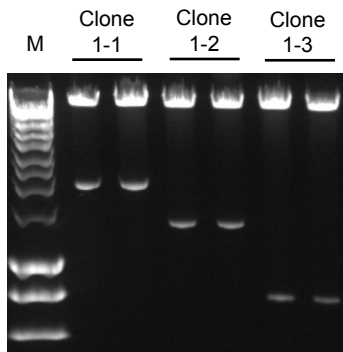

**C**

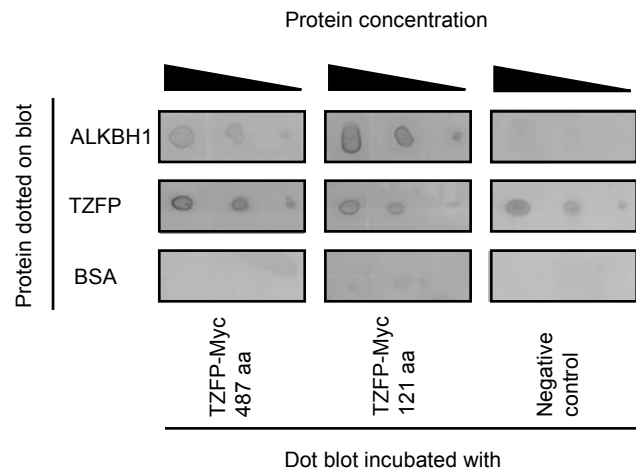

**A**

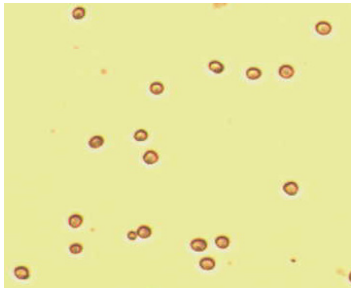

~1.5 x 10<sup>6</sup> pachytene cells  
 $\bar{X}_{\text{size}} = 12.5 \mu\text{m}$

**B**

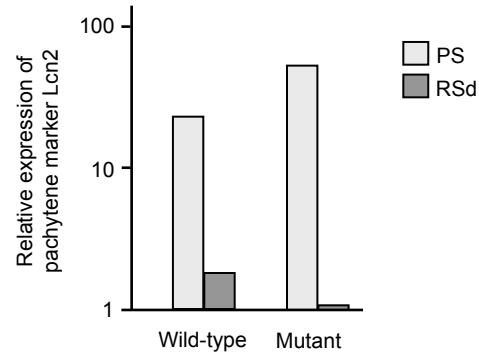

**C**

STAPUT isolated pachytene cells

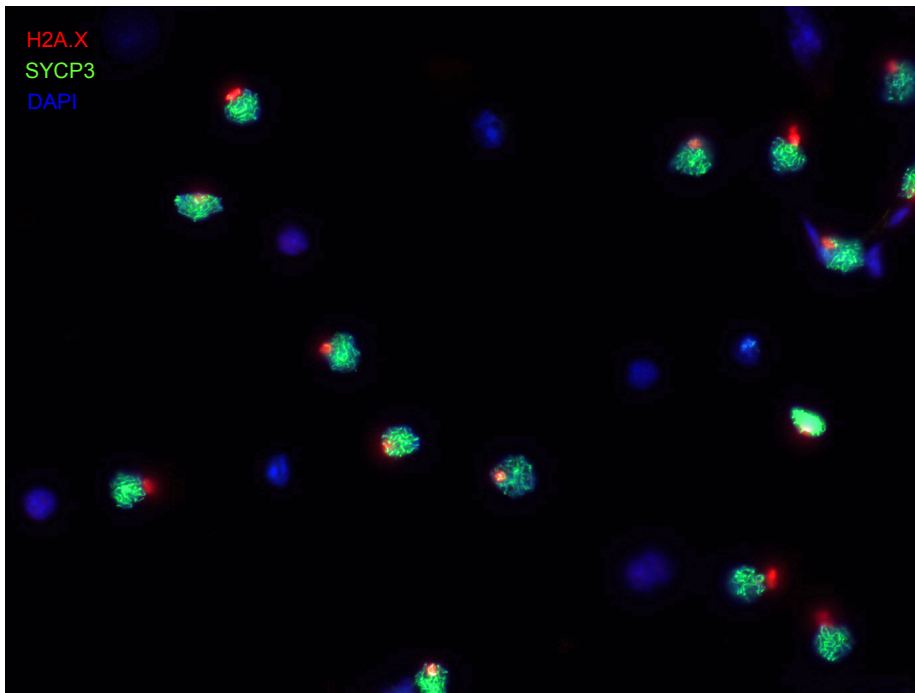

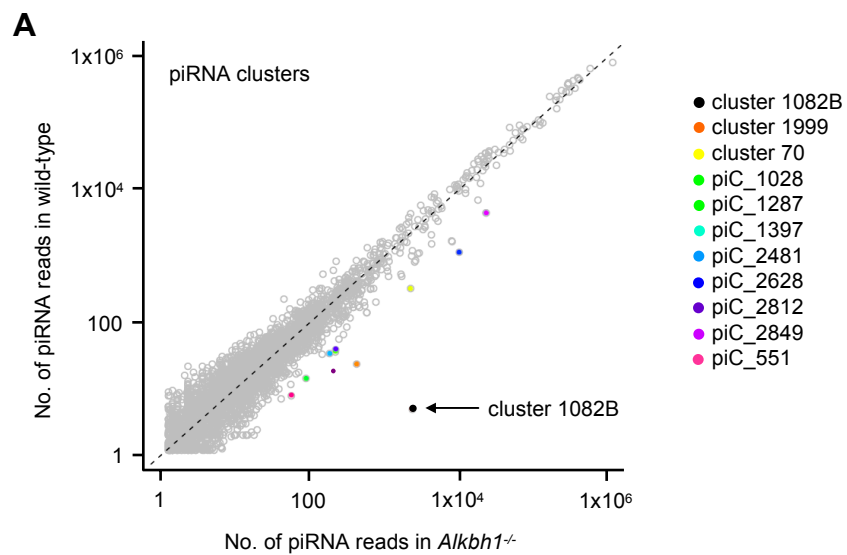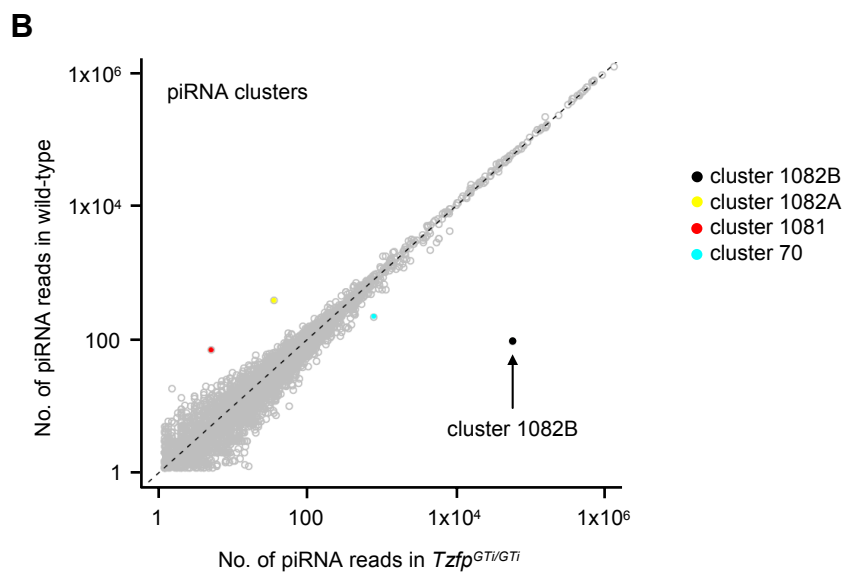



**A**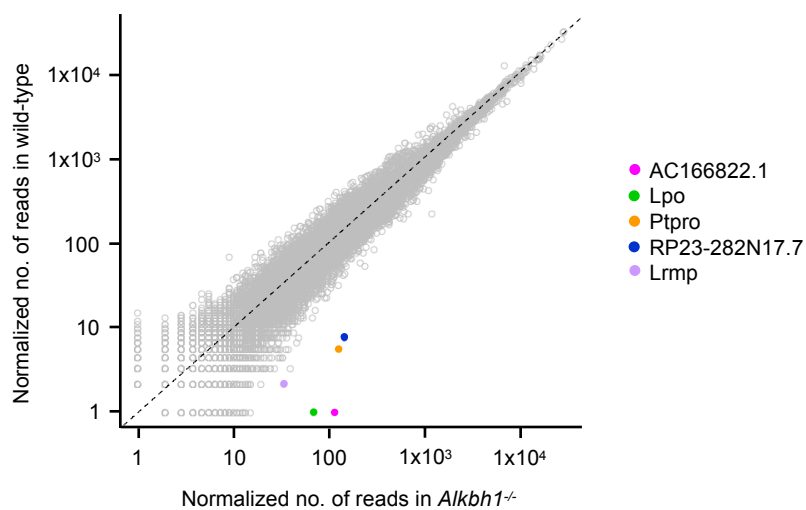**B**

| Gene Name                                                  | Gene Symbol   | Relative Change |
|------------------------------------------------------------|---------------|-----------------|
| Ras-like guanine nucleotide exchange factor domain protein | AC166822.1    | 7.12            |
| Lactoperoxidase                                            | Lpo           | 6.38            |
| Protein tyrosine phosphatase, receptor type, O             | Ptpro         | 4.70            |
| Krüppel-associated box (KRAB) containing protein           | RP23-282N17.7 | 4.40            |
| Lymphoid-restricted membrane protein                       | Lrmp          | 4.12            |

| Methods                             | Sequence (5'-3')                                                                                                                                                                                                                            | Details                                                                                                                                                                                                                                                                                |
|-------------------------------------|---------------------------------------------------------------------------------------------------------------------------------------------------------------------------------------------------------------------------------------------|----------------------------------------------------------------------------------------------------------------------------------------------------------------------------------------------------------------------------------------------------------------------------------------|
| PCR genotyping                      | 1. AGTTATCAGGGCCATCCAGGGAGGT<br>2. AACTGAGAGGTACAGGGAAGCATAA<br>3. GCTTGCCGAATATCATGGTG<br>4. GCTCAACAAGTCAAGACTTT<br>5. ACTGTGGCAGACTAATACTT<br>6. CTTGCAAAATGGCGTTACTTAAGC                                                                | <i>Alkbh1</i> WT allele<br><i>Alkbh1</i> WT + KO allele<br><i>Alkbh1</i> KO allele<br><i>Tzfp</i> WT allele<br><i>Tzfp</i> WT + GTi allele<br><i>Tzfp</i> GTi allele                                                                                                                   |
| TaqMan qPCR                         | 7. Mm01296827_m1<br>8. Mm00491292_g1<br>9. Mm01277432_m1<br>10. Mm99999915_g1                                                                                                                                                               | <i>Alkbh1</i> probe<br><i>Tzfp</i> probe<br>4933440M02Rik probe<br><i>Gapdh</i> probe                                                                                                                                                                                                  |
| miScript Primer Assay               | 11. UGGAACUCACUUUGUAGACCAGGCUGGCCU<br>12. UCUCAGUCCGUACCAGGUAGAGACCAGAU<br>13. GAGGCUGUGGAGACAAUCACAAUUGACAGA<br>14. UGCCACAUGGGAGCUUCCUCAAUUGACU<br>15. UACAUUGACUGAUUCACUUGGUUUGUCCC                                                      | (1) piR-19852<br>(2) piR-12359<br>(3) piR-103121<br>(4) piR-17918<br>(5) piR-4749                                                                                                                                                                                                      |
| piRNA FISH                          | 16. GATCTGGTCTCTACCTGGTACGGACTGAGA-DIG                                                                                                                                                                                                      | (2) piR-12359                                                                                                                                                                                                                                                                          |
| SYBR Green qPCR<br>Transposons      | 17. GCGAAAGGCCAAACGTAAGA<br>18. GGAGTGCTGCGTTCTGATGA<br>19. GGAGGGACATTTTCATTCTCATCA<br>20. GCTGCTCTTGTATTTGGAGCATAGA<br>21. GCACATGCGCAGATTATTTGTT<br>22. CCACATTCGCCGTTACAAGAT<br>23. AACCAATGCTAATTTACCTTGGT<br>24. GCCAATCAGCAGGCGTTAGT | <i>LINE1</i> 5'UTR forward primer<br><i>LINE1</i> 5'UTR reverse primer<br><i>LINE1</i> ORF2 forward primer<br><i>LINE1</i> ORF2 reverse primer<br><i>IAP</i> 3'LTR forward primer<br><i>IAP</i> 3'LTR reverse primer<br><i>IAP</i> Gag forward primer<br><i>IAP</i> Gag reverse primer |
| SYBR Green qPCR<br>Pachytene marker | 25. CCATCTTTCTGTTGCCAGAG<br>26. GACGCCATTGGTGGTGTAAAG<br>27. TCGTCCCGTAGACAAAATGGT<br>28. CGCCCAATACGGCCAAA                                                                                                                                 | <i>Lcn2</i> forward primer<br><i>Lcn2</i> reverse primer<br><i>Gapdh</i> forward primer<br><i>Gapdh</i> reverse primer                                                                                                                                                                 |

Table S2

|                               | <b>Wild-type</b> | <b><i>Alkbh1</i><sup>-/-</sup></b> | <b>Wild-type</b> | <b><i>Tzfp</i><sup>GT/GTi</sup></b> |                 |
|-------------------------------|------------------|------------------------------------|------------------|-------------------------------------|-----------------|
| Total # mapped                | 10504223         | 8072816                            | 15565882         | 15259047                            |                 |
| <b>Non-coding RNA classes</b> | reads            | reads                              | reads            | reads                               | SUM             |
| piRNA                         | 9761468          | 6985408                            | 14653799         | 14125026                            | <b>45525701</b> |
| miRNA                         | 157859           | 518065                             | 195942           | 348381                              | <b>1220247</b>  |
| rRNA                          | 9513             | 7154                               | 1016             | 1294                                | <b>18977</b>    |
| tRNA                          | 4525             | 6142                               | 3631             | 4434                                | <b>18732</b>    |
| snoRNA                        | 10607            | 6642                               | 3230             | 5172                                | <b>25651</b>    |
| snRNA                         | 688              | 932                                | 492              | 579                                 | <b>2691</b>     |
| lincRNA                       | 4749             | 5062                               | 6724             | 6704                                | <b>23239</b>    |
| miscRNA                       | 152              | 142                                | 108              | 122                                 | <b>524</b>      |
| Unknown                       | 332716           | 318246                             | 423160           | 468123                              | <b>1542245</b>  |
| <b>SUM (mapped &lt;6)</b>     | <b>10282277</b>  | <b>7847793</b>                     | <b>15288102</b>  | <b>14959835</b>                     | <b>48378007</b> |
| Mapped > 5                    | 221946           | 225023                             | 277780           | 299212                              | <b>1023961</b>  |
| % Mapped                      | 79%              | 75%                                | 78%              | 76%                                 | 49401968        |
| <b>Repeats</b>                | reads            | reads                              | reads            | reads                               | SUM             |
| LTR                           | 768396           | 498372                             | 1144105          | 1094012                             | <b>3504885</b>  |
| LINE                          | 457412           | 274246                             | 662868           | 618912                              | <b>2013438</b>  |
| SINE                          | 349614           | 248886                             | 528862           | 511532                              | <b>1638894</b>  |
| Other                         | 221024           | 208632                             | 372079           | 319968                              | <b>1121703</b>  |
| <b>SUM</b>                    | <b>1796446</b>   | <b>1230136</b>                     | <b>2707914</b>   | <b>2544424</b>                      | <b>8278920</b>  |
| SUM regulars                  | 1575422          | 1021504                            | 2335835          | 2224456                             | 7157217         |
| Non-repeats                   | 8707777          | 6842680                            | 12857968         | 12714623                            | <b>41123048</b> |
| Non-repeats (mapped <6)       | 8485831          | 6617657                            | 12580188         | 12415411                            | 40099087        |
| <b>Mappings to regions</b>    | reads            | reads                              | reads            | reads                               | SUM             |
| Exonic                        | 586034           | 822064                             | 851772           | 999077                              | <b>3258947</b>  |
| Intronic                      | 313159           | 288309                             | 419694           | 427714                              | <b>1448876</b>  |
| 5' UTR                        | 124261           | 155553                             | 154737           | 176812                              | <b>611363</b>   |
| 3' UTR                        | 9489             | 15013                              | 9688             | 14198                               | <b>48388</b>    |
| Intergenic                    | 9471280          | 6791877                            | 14129991         | 13641246                            | <b>44034394</b> |
| <b>SUM</b>                    | <b>10504223</b>  | <b>8072816</b>                     | <b>15565882</b>  | <b>15259047</b>                     | <b>49401968</b> |
| SUM (mapped <6)               | 9249334          | 6566854                            | 13852211         | 13342034                            | 43010433        |

| Cluster Name  | Wild-type reads | <i>Alkbh1</i> <sup>-/-</sup> reads | Logfold Change | Wild-type reads | <i>Tzfp</i> <sup>GTI/GTI</sup> reads | Logfold Change |
|---------------|-----------------|------------------------------------|----------------|-----------------|--------------------------------------|----------------|
| cluster 1082B | 4               | 1858                               | 8.86           | 94              | 57188                                | 9.25           |
| cluster 1081  | 36              | 15                                 | -1.26          | 69              | 4                                    | -4.11          |
| cluster 1999  | 23              | 330                                | 3.87           | 17              | 63                                   | 1.92           |
| cluster 1082A | 258             | 199                                | -0.37          | 383             | 34                                   | -3.5           |
| piC_2628      | 1165            | 7923                               | 2.77           | 4279            | 8156                                 | 0.93           |
| piC_551       | 7               | 43                                 | 2.62           | 8               | 25                                   | 1.64           |
| cluster 70    | 326             | 1755                               | 2.43           | 218             | 768                                  | 1.82           |
| piC_1287      | 14              | 68                                 | 2.33           | 24              | 21                                   | -0.21          |
| piC_1028      | 36              | 170                                | 2.26           | 80              | 126                                  | 0.65           |
| piC_2812      | 39              | 172                                | 2.14           | 150             | 248                                  | 0.72           |
| piC_2481      | 34              | 142                                | 2.09           | 127             | 242                                  | 0.93           |
| piC_1397      | 4586            | 18280                              | 2              | 3264            | 5816                                 | 0.83           |
| piC_2849      | 4586            | 18280                              | 2              | 3265            | 5816                                 | 0.83           |

| Gene ID            | Wild-type reads | <i>Alkbh1</i> <sup>-/-</sup> reads | Logfold Change | Gene Symbol   |
|--------------------|-----------------|------------------------------------|----------------|---------------|
| ENSMUSG00000072616 | 0               | 138                                | 7.12           | AC166822.1    |
| ENSMUSG00000009356 | 0               | 82                                 | 6.38           | Lpo           |
| ENSMUSG00000030223 | 4               | 154                                | 4.7            | Ptpro         |
| ENSMUSG00000078503 | 6               | 178                                | 4.4            | RP23-282N17.7 |
| ENSMUSG00000030263 | 1               | 38                                 | 4.12           | Lrmp          |
| ENSMUSG00000056220 | 65              | 9                                  | -3.03          | Pla2g4a       |
| ENSMUSG00000009621 | 226             | 1611                               | 2.51           | Vav2          |
| ENSMUSG00000029369 | 50              | 299                                | 2.25           | Afm           |
| ENSMUSG00000041536 | 414             | 145                                | -1.82          | Serpina3a     |
| ENSMUSG00000000567 | 383             | 139                                | -1.77          | Sox9          |
| ENSMUSG00000037432 | 195             | 786                                | 1.69           | Fer1l5        |
| ENSMUSG00000041245 | 531             | 209                                | -1.66          | Wnk3-ps       |
| ENSMUSG00000079173 | 228             | 889                                | 1.65           | Zan           |
| ENSMUSG00000045330 | 548             | 220                                | -1.63          | 4933402E13Rik |
| ENSMUSG00000049775 | 626             | 271                                | -1.52          | Tmsb4x        |
| ENSMUSG00000038199 | 319             | 1097                               | 1.47           | 4931409K22Rik |
| ENSMUSG00000040354 | 435             | 1483                               | 1.45           | Mars          |
| ENSMUSG00000068522 | 1449            | 696                                | -1.37          | Aard          |
| ENSMUSG00000027199 | 1693            | 815                                | -1.37          | Gatm          |
| ENSMUSG00000034219 | 1155            | 559                                | -1.36          | Sept14        |
| ENSMUSG00000030605 | 1119            | 543                                | -1.36          | Mfge8         |
| ENSMUSG00000022390 | 1673            | 824                                | -1.34          | Zc3h7b        |
| ENSMUSG00000059248 | 1154            | 589                                | -1.28          | Sept9         |
| ENSMUSG00000039428 | 1023            | 525                                | -1.28          | Tmem135       |
| ENSMUSG00000027445 | 2150            | 1146                               | -1.22          | Cst9          |
| ENSMUSG00000021477 | 4746            | 2704                               | -1.13          | Ctsl          |
| ENSMUSG00000037625 | 1561            | 901                                | -1.11          | Cldn11        |
| ENSMUSG00000036687 | 2152            | 1274                               | -1.07          | Tmem184a      |
| ENSMUSG00000040260 | 2714            | 1612                               | -1.07          | Daam2         |
| ENSMUSG00000033161 | 2554            | 1537                               | -1.05          | Atp1a1        |
| ENSMUSG00000025151 | 2526            | 1532                               | -1.04          | Maged1        |
| ENSMUSG00000023047 | 3735            | 2304                               | -1.01          | Amhr2         |
| ENSMUSG00000022037 | 15030           | 9895                               | -0.92          | Clu           |
| ENSMUSG00000004207 | 4096            | 2930                               | -0.8           | Psap          |

| Cluster 1082B |      | Mouse genome (NCBI 37/mm9) |        |           |           |
|---------------|------|----------------------------|--------|-----------|-----------|
| Start         | End  | Chr                        | Strand | Start     | End       |
| 1292          | 2078 | 3                          | -      | 20402645  | 20401882  |
| 1375          | 2031 | 6                          | +      | 121678236 | 121678932 |
| 1377          | 2031 | 6                          | +      | 121780705 | 121781412 |
| 2176          | 2645 | 6                          | +      | 121781344 | 121781828 |
| 2218          | 2739 | 6                          | +      | 121945714 | 121946245 |
| 2229          | 2641 | 6                          | +      | 122083487 | 122083901 |
| 2218          | 2739 | 6                          | +      | 122114964 | 122115495 |
| 2248          | 2538 | 11                         | -      | 21404638  | 21404353  |
| 260           | 1301 | 11                         | -      | 21407654  | 21406600  |
| 2             | 314  | 11                         | -      | 21407935  | 21407636  |
| 4098          | 4210 | 12                         | -      | 55274702  | 55274590  |
| 2792          | 3839 | 12                         | -      | 55276549  | 55275477  |
| 1354          | 2667 | 13                         | -      | 8929370   | 8928049   |
| 890           | 1217 | 13                         | -      | 8930278   | 8929945   |
| 2             | 1276 | 13                         | +      | 49859505  | 49860887  |
| 2797          | 3338 | 13                         | +      | 49940070  | 49940613  |
| 1244          | 2737 | 13                         | -      | 50160392  | 50158851  |
| 2             | 908  | 13                         | -      | 50510202  | 50509269  |
| 546           | 1150 | 13                         | +      | 52212995  | 52213592  |
| 1623          | 2452 | 13                         | +      | 52214343  | 52215179  |
| 1293          | 1937 | 13                         | -      | 52519668  | 52518988  |
| 1563          | 2775 | 13                         | -      | 52528902  | 52527636  |
| 1318          | 2086 | 16                         | -      | 16710254  | 16709448  |
| 260           | 1203 | 17                         | -      | 54051739  | 54050782  |
| 260           | 1246 | 17                         | -      | 54088485  | 54087479  |
| 1769          | 2060 | 18                         | +      | 6684413   | 6684697   |
